# Supplementary material for: Pharmacological Potential of Flavonoids against Neurotropic Viruses
Source: MDPI journal article supplement (doi:10.3390/ph15091149), 2022-09-15
Supplement: s1 [file s1]

# Pharmacological Potential of Flavonoids against Neurotropic Viruses

Juliana Helena Castro e Silva <sup>1</sup>, Jéssica Teles Souza <sup>1</sup>, Clarissa Schitine <sup>1</sup>,  
Aníbal de Freitas Santos Júnior <sup>2</sup>, Eduardo Muniz Santana Bastos <sup>1</sup> and Silvia Lima Costa <sup>1,\*</sup>

<sup>1</sup> Department of Biochemistry and Biophysics, Health Sciences Institute, Federal University of Bahia, Salvador 40110-100, Brazil

<sup>2</sup> Department of Life Sciences, State University of Bahia, Salvador 41150-000, Brazil

\* Correspondence: costasl@ufba.br

**Table S1. Summary of all publications included in the study.**

| Author                   | Article                                                                                                                                     | Country                  | Year | Journal                      | Study Model             | Flavonoid                                                                                    | Virus                                                        |
|--------------------------|---------------------------------------------------------------------------------------------------------------------------------------------|--------------------------|------|------------------------------|-------------------------|----------------------------------------------------------------------------------------------|--------------------------------------------------------------|
| KASHIWADA et al          | New a-glucosides of caffeoyl quinic acid from the leaves of <i>Moringa oleifera</i> Lam.                                                    | Japan                    | 2011 | Journal of natural medicines | <i>In vitro</i>         | Extract from leaves of <i>Moringa oleifera</i> Lam. (Moringaceae) Ayurvedic medicinal plant. | Influenza A                                                  |
| DOU et al                | Effects of Baicalein on Sendai Virus in Vivo Are Linked to Serum Baicalin and Its Inhibition of Hemagglutinin-Neuraminidase                 | China                    | 2011 | Archives of virology         | <i>In vitro/In vivo</i> | Baicalein                                                                                    | Sendai Virus (SeV)                                           |
| GOLDWASSER et al         | Naringenin Inhibits the Assembly and Long-Term Production of Infectious Hepatitis C Virus Particles Through a PPAR-mediated Mechanism       | United States of America | 2011 | Journal of hepatology        | <i>In vitro</i>         | Naringenin, (WY14, 643, GW9662), and Brefeldin A (BFA)                                       | Hepatitis C virus (HCV)                                      |
| MEHLA et al              | A flavonoid, luteolin, cripples HIV-1 by abrogation of tat function.                                                                        | United States of America | 2011 | PLoS One                     | <i>In vitro</i>         | Luteolin, Quercetin, and Myricetin                                                           | Human Immunodeficiency Virus 1 (HIV-1)                       |
| CHEN et al               | Synergistic Activity of Baicalein With Ribavirin Against Influenza A (H1N1) Virus Infections in Cell Culture and in Mice                    | China                    | 2011 | Antiviral research           | <i>In vitro/In vivo</i> | Baicalein                                                                                    | Influenza A (H1N1) virus                                     |
| SONG et al               | Quercetin 7-rhamnoside reduces porcine epidemic diarrhea virus replication via independent pathway of viral induced reactive oxygen species | South Korea              | 2011 | Virology journal             | <i>In vitro</i>         | Quercetin 7-rhamnoside (Q7R)                                                                 | Porcine epidemic diarrhea virus (PEDV CV)                    |
| BACHMETOV et al          | Suppression of Hepatitis C Virus by the Flavonoid Quercetin Is Mediated by Inhibition of NS3 Protease Activity                              | Israel                   | 2011 | Journal of viral hepatitis   | <i>In vitro</i>         | Quercetin                                                                                    | Hepatitis C virus (HCV)                                      |
| OZÇELİK, KARTAL, & ORHAN | Cytotoxicity, antiviral and antimicrobial activities of alkaloids, flavonoids, and phenolic acids                                           | Turkey                   | 2011 | Pharmaceutical biology       | <i>In vitro</i>         | Quercetin, Genistein, Apigenin, Naringin, Silibinin, and Silymarin                           | Virus herpes simplex type 1 and parainfluenza (type-3) virus |

|                   |                                                                                                                                                                    |        |      |                                             |                         |                                                                                                                                                                                                                               |                                                                                                                    |
|-------------------|--------------------------------------------------------------------------------------------------------------------------------------------------------------------|--------|------|---------------------------------------------|-------------------------|-------------------------------------------------------------------------------------------------------------------------------------------------------------------------------------------------------------------------------|--------------------------------------------------------------------------------------------------------------------|
| YARMOLINSKY et al | Potent Antiviral Flavone Glycosides From Ficus Benjamina Leaves                                                                                                    | Israel | 2012 | Fitoterapia                                 | <i>In vitro</i>         | Quercetin 3-O- $\alpha$ -rhamnopyranosyl(1–6)- $\beta$ -glucopyranoside; kaempferol 3-O- $\alpha$ -rhamnopyranosyl(1–6)- $\beta$ -glucopyranoside; kaempferol 3-O- $\alpha$ -rhamnopyranosyl(1–6)- $\beta$ -galactopyranoside | Herpes Simplex Virus-1 (HSV-1)                                                                                     |
| LU & CHONG        | Combining Molecular Docking and Molecular Dynamics to Predict the Binding Modes of Flavonoid Derivatives With the Neuraminidase of the 2009 H1N1 Influenza A Virus | China  | 2012 | International journal of molecular sciences | <i>In silico</i>        | 20 flavonoid derivatives (2,3-dihydrobenzofuran and 5,7-dihydroxychromen-4-one backbones) that were constructed and minimized using VEGA ZZ [41] and ISIS/DRAW [42] programs.                                                 | Influenza A (H1N1) virus                                                                                           |
| CHEN et al        | Houttuynoids A-E, Anti-Herpes Simplex Virus Active Flavonoids With Novel Skeletons From Houttuynia Cordata                                                         | China  | 2012 | Organic letters                             | <i>in vitro</i>         | Houttuynoids A E (1 5)                                                                                                                                                                                                        | Anti-Herpes Simplex Virus                                                                                          |
| PARK et al        | Synthesis and Antiviral Evaluation of 7-O-arylmethylquercetin Derivatives Against SARS-associated Coronavirus (SCV) and Hepatitis C Virus (HCV)                    | Korea  | 2012 | Archives of pharmacal research              | <i>In vitro</i>         | 26 aromatic substituents of 7-O-arylmethylquercetin derivatives                                                                                                                                                               | SARS-associated coronavirus (SARS-CoV, SCV) and hepatitis C virus (HCV)                                            |
| HAYASHI et al     | In vitro and in vivo evaluation of a novel antiherpetic flavonoid, 4'-phenylflavone, and its synergistic actions with acyclovir.                                   | Japan  | 2012 | Archives of virology                        | <i>In vitro/In vivo</i> | 4'-Phenylflavone                                                                                                                                                                                                              | Herpes simplex virus 1/2 (HSV-1 and HSV-2), poliovirus type 1; human cytomegalovirus (HCMV); and Influenza A virus |

|               |                                                                                                                     |         |      |                                         |                           |                                                                                                                                                                                                                                                      |                         |
|---------------|---------------------------------------------------------------------------------------------------------------------|---------|------|-----------------------------------------|---------------------------|------------------------------------------------------------------------------------------------------------------------------------------------------------------------------------------------------------------------------------------------------|-------------------------|
| HAID et al    | A Plant-Derived Flavonoid Inhibits Entry of All HCV Genotypes Into Human Hepatocytes                                | Germany | 2012 | Gastroenterology                        | <i>In vitro</i>           | Synthetic Ladanein (BJ486K) produced in laboratory and extracts from Marrubium peregrinum L (Lamiaceae)                                                                                                                                              | Hepatitis C virus (HCV) |
| WANG et al    | [Protein Kinase Inhibitor Flavopiridol Inhibits the Replication of Influenza Virus in Vitro]                        | China   | 2012 | Acta microbiologica Sinica              | <i>In vitro</i>           | Flavopiridol                                                                                                                                                                                                                                         | Influenza Virus         |
| MA et al      | Anti-hepatitis B Virus Activity of Chickweed [Stellaria Media (L.) Vill.] Extracts in HepG2.2.15 Cells              | China   | 2012 | Molecules                               | <i>In vitro</i>           | Extract from Stellaria media (L.) Vill., a Chinese folk medicine that belongs to the Caryophyllaceae flowering plant family.                                                                                                                         | Hepatitis B virus (HBV) |
| CONTIN et al  | Eight Flavonoids and Their Potential as Inhibitors of Human Cytomegalovirus Replication                             | France  | 2012 | Antiviral research                      | <i>In vitro</i>           | Baicalein, naringenin, quercetin and quercetagenin (flavones, flavanones and flavonols, respectively), chalcones (20,30,40-trihydroxychalcone, 2,20,40-trihydroxychalcone, naringenin chalcone and Butein) were produced by EA4021 (Limoges, France) | Cytomegalovirus (HCMV)  |
| LIU et al     | Discovery of Flavonoid Derivatives as anti-HCV Agents via Pharmacophore Search Combining Molecular Docking Strategy | China   | 2012 | European journal of medicinal chemistry | <i>In silico/In vitro</i> | Apigenin and Luteolin                                                                                                                                                                                                                                | Hepatitis C virus (HCV) |
| CALLAND et al | (-)-Epigallocatechin-3-gallate Is a New Inhibitor of Hepatitis C Virus Entry                                        | France  | 2012 | Hepatology (Baltimore, Md.)             | <i>In vitro</i>           | (-)-epigallocatechin-3-gallate (EGCG) , (+)-catechin, (-)-epicatechin (EC), (-)-epicatechin-3-gallate (ECG), (-)-                                                                                                                                    | Hepatitis C virus (HCV) |

|                          |                                                                                                                          |                                |      |                                      |                               |                                                                                                                                                                                                                                                                         |                                                                                                                                          |
|--------------------------|--------------------------------------------------------------------------------------------------------------------------|--------------------------------|------|--------------------------------------|-------------------------------|-------------------------------------------------------------------------------------------------------------------------------------------------------------------------------------------------------------------------------------------------------------------------|------------------------------------------------------------------------------------------------------------------------------------------|
|                          |                                                                                                                          |                                |      |                                      |                               | epigallocatechin (EGC),<br>and EGCG                                                                                                                                                                                                                                     |                                                                                                                                          |
| VISINTINI-JAIME<br>et al | In Vitro Antiviral Activity of Plant Extracts From<br>Asteraceae Medicinal Plants                                        | Argentina                      | 2013 | Virology journal                     | <i>In vitro</i>               | Organic (OE) and<br>aqueous extracts (AE)<br>from: Baccharis<br>gaudichaudiana,<br>Baccharis spicata,<br>Bidens subalternans,<br>Pluchea sagittalis,<br>Tagetes minuta and<br>Tessaria absinthioides,<br>all medicinal plants<br>belonging to the<br>Asteraceae family. | Bovine viral diarrhea<br>virus, herpes simplex<br>virus type 1 (HSV-1),<br>poliovirus type 2 (PV-<br>2) and vesicular<br>tomatitis virus |
| CHERRY et al             | Structure Based Identification and Characterization<br>of Flavonoids That Disrupt Human<br>papillomavirus-16 E6 Function | United<br>States of<br>America | 2013 | PloS one                             | <i>In silico/In<br/>vitro</i> | Flavonoid luteolin and<br>the novel flavone analog<br>CAF-24                                                                                                                                                                                                            | Human<br>papillomavirus (HPV)                                                                                                            |
| KRALJ et al              | Development of Flavonoid-Based Inverse Agonists<br>of the Key Signaling Receptor US28 of Human<br>Cytomegalovirus        | Germany                        | 2013 | Journal of<br>medicinal<br>chemistry | <i>In vitro</i>               | A series of 31 chalcone-<br>and flavonoid-based<br>derivatives                                                                                                                                                                                                          | Human<br>cytomegalovirus<br>(HCMV)                                                                                                       |
| KIM et al                | Inhibition of Influenza Virus Internalization by (-)-<br>epigallocatechin-3-gallate                                      | South<br>Korea                 | 2013 | Antiviral<br>research                | <i>In vitro</i>               | (-)-Epigallocatechin-3-<br>gallate<br>(EGCG), epigallocatechin<br>(EGC), epicatechin<br>monogallate (ECG), and<br>2' 2'-bisepigallocatechin<br>digallate (bEGCdG),                                                                                                      | Influenza virus                                                                                                                          |
| CHEN et al               | Anti HSV-1 Flavonoid Derivatives Tethered With<br>Houttuynin From Houttuynia Cordata                                     | China                          | 2013 | Planta medica                        | <i>In vitro</i>               | Extract from Houttuynia<br>cordata Thunb.<br>(Saururaceae) widely<br>cultivated or harvested<br>in China and other<br>Asian countries<br>(collected in Guangdong<br>province in July 2009).                                                                             | Herpes simplex virus<br>1 (HSV-1)                                                                                                        |

|                  |                                                                                                    |        |      |                |                  |                                                                                                                                                                                                                                                                                                                                                                                                                                                                   |                          |
|------------------|----------------------------------------------------------------------------------------------------|--------|------|----------------|------------------|-------------------------------------------------------------------------------------------------------------------------------------------------------------------------------------------------------------------------------------------------------------------------------------------------------------------------------------------------------------------------------------------------------------------------------------------------------------------|--------------------------|
| COULERIE et al   | Structure-activity Relationship Study of Biflavonoids on the Dengue Virus Polymerase DENV-NS5 RdRp | France | 2013 | Planta medica  | <i>In vitro</i>  | Amentoflavone, Podocarpusflavone, Isoginkgetin, Hinokiflavone derivative from Dacrydium balansae (Podocarpaceae) and robustaflavone, Sequoiaflavone, Bilobetin, Sotetsuflavone, Ginkgetin, Sciadopitysin isolated from D. araucarioides (Podocarpaceae from South province of New Caledonia), and apigenin derivatives (Acacetin, genkwanin, 7,4'-dimethylapigenin , trimethylapigenin ,pinocembrin, naringenin, galangin, quercetin, rhamnetin, and kaempferol). | Dengue virus (DENV)      |
| SENTHILVEL et al | Flavonoid From Carica Papaya Inhibits NS2B-NS3 Protease and Prevents Dengue 2 Viral Assembly       | India  | 2013 | Bioinformation | <i>In silico</i> | Anti-dengue activities of the extracts from Carica papaya (family Caricaceae). Seven phenolic compounds: quercetin, protocatechuic acid, p-coumaric acid, caffeic acid, chlorogenic acid, kaempferol, and 5,7-dimethoxycoumarin.                                                                                                                                                                                                                                  | Dengue 2 virus (DENV-2). |

|                  |                                                                                                                                                                                                  |             |      |                                                              |                           |                                                                                                                                                              |                                                             |
|------------------|--------------------------------------------------------------------------------------------------------------------------------------------------------------------------------------------------|-------------|------|--------------------------------------------------------------|---------------------------|--------------------------------------------------------------------------------------------------------------------------------------------------------------|-------------------------------------------------------------|
| ZANDI et al      | Extract of Scutellaria Baicalensis Inhibits Dengue Virus Replication                                                                                                                             | Malaysia    | 2013 | BMC complementary and alternative medicine                   | <i>In vitro</i>           | Aqueous extract of the roots of Scutellaria baicalensis (S. baicalensis)                                                                                     | Dengue virus (DENV-1, DENV-2, DENV-3 and DENV-4) serotypes. |
| LOU et al        | Inhibition of Hepatitis C Virus Replication in Vitro by Xanthohumol, a Natural Product Present in Hops                                                                                           | China       | 2013 | Planta medica                                                | <i>In vitro</i>           | Xanthohumol (XN)                                                                                                                                             | Hepatitis C virus                                           |
| LI et al         | Design and Discovery of Flavonoid-Based HIV-1 Integrase Inhibitors Targeting Both the Active Site and the Interaction With LEDGF/p75                                                             | China       | 2014 | Bioorganic & medicinal chemistry                             | <i>In silico/In vitro</i> | Syntheses to generate a series 68 mono-substituted flavonoid derivatives (including quercetin, baicalein, luteolin, apigenin, crysin, naringenin, genistein) | Human Immunodeficiency Virus 1 (HIV-1)                      |
| ZHANG et al      | The Flavonoid From Polygonum Perfoliatum L. Inhibits Herpes Simplex Virus 1 Infection                                                                                                            | China       | 2014 | Acta virologica                                              | <i>In vitro/In vivo</i>   | Extract from Polygonum perfoliatum L (commonly known as mile-a-minute weed).                                                                                 | Herpes simplex virus 1 (HSV-1)                              |
| YIN et al        | Antiviral Activity of Total Flavonoid Extracts From Selaginella Moellendorffii Hieron Against Coxsackie Virus B3 In Vitro and In Vivo                                                            | China       | 2014 | Evidence-based complementary and alternative medicine : eCAM | <i>In vitro/In vivo</i>   | Extract from The whole herbs of Selaginella moellendorffii Hieron.                                                                                           | Coxsackie virus B3 (CVB3)                                   |
| JOHN et al       | Metabolic Variations, Antioxidant Potential, and Antiviral Activity of Different Extracts of Eugenia Singampattiana (An Endangered Medicinal Plant Used by Kani Tribals, Tamil Nadu, India) Leaf | South Korea | 2014 | BioMed research international                                | <i>In vitro</i>           | Extract from Eugenia singampattiana is a small tree belonging to the family Myrtaceae.                                                                       | Porcine reproductive and respiratory syndrome virus (PRRSV) |
| DOS SANTOS et al | Quercetin and Quercetin 3-O-glycosides From Bauhinia Longifolia (Bong.) Steud. Show anti-Mayaro Virus Activity                                                                                   | Brazil      | 2014 | Parasites & vectors                                          | <i>In vitro</i>           | Extract from of Bauhinia longifolia (Bong.) Steud.                                                                                                           | Mayaro virus (MAYV)                                         |

|                 |                                                                                                                                         |             |      |                                           |                                   |                                                                                                                                                                                                                                                                                                                                                                                                                                                                                                                          |                          |
|-----------------|-----------------------------------------------------------------------------------------------------------------------------------------|-------------|------|-------------------------------------------|-----------------------------------|--------------------------------------------------------------------------------------------------------------------------------------------------------------------------------------------------------------------------------------------------------------------------------------------------------------------------------------------------------------------------------------------------------------------------------------------------------------------------------------------------------------------------|--------------------------|
| NAYAK et al     | Antiviral Activity of Baicalin Against Influenza Virus H1N1-pdm09 Is Due to Modulation of NS1-mediated Cellular Innate Immune Responses | India       | 2014 | The Journal of antimicrobial chemotherapy | <i>In vitro/in silico/in vivo</i> | Baicalin                                                                                                                                                                                                                                                                                                                                                                                                                                                                                                                 | Influenza A (H1N1) virus |
| HOSSAIN et al   | Antiviral Activity of 3,4'-dihydroxyflavone on Influenza a Virus                                                                        | South Korea | 2014 | Journal of microbiology (Seoul, Korea)    | <i>In vitro/In vivo</i>           | 3-hydroxyflavone (3-HF), 3,2'-dihydroxyflavone (3,2'-DHF), 3,3'-dihydroxyflavone (3,3'-DHF), 3,4'-dihydroxyflavone (3,4'-DHF), 4-hydroxyflavone (4-HF), 4'-hydroxy-5-methoxyflavone (4'-H5-MF), 4'-hydroxy-6-methoxyflavone (4'-H6-MF), 4'-hydroxy-7-methoxyflavone (4'-H7-MF), 5,7-dihydroxy-3',4',5'-trimethoxyflavone (5,7-D,3',4',5'-TMF), 6,4'-dihydroxyflavone (6,4'-DHF), 7,8,4'-trihydroxyflavone (7,8,4'-THF), 3,5,7-trihydroxy-4'-methoxyflavone (diosmetin), and 3,5,7-3',4'-pentahydroxyflavone (quercetin), | Influenza A (H1N1) virus |
|                 |                                                                                                                                         |             |      |                                           |                                   |                                                                                                                                                                                                                                                                                                                                                                                                                                                                                                                          |                          |
| MICHAELIS et al | Effects of Flavonoid-Induced Oxidative Stress on anti-H5N1 Influenza a Virus Activity Exerted by Baicalein and Biochanin A              | Germany     | 2014 | BMC research notes                        | <i>In vitro</i>                   | Biochanin A and Baicalein                                                                                                                                                                                                                                                                                                                                                                                                                                                                                                | Influenza A (H5N1) virus |
| MOGHADDAM et al | Baicalin, a Metabolite of Baicalein With Antiviral Activity Against Dengue Virus                                                        | Malaysia    | 2014 | Scientific reports                        | <i>In vitro</i>                   | Baicalin                                                                                                                                                                                                                                                                                                                                                                                                                                                                                                                 | Dengue virus (DENV)      |



|                 |                                                                                                                |             |      |                                       |                           |                                                                                                                                                                      |                                                      |
|-----------------|----------------------------------------------------------------------------------------------------------------|-------------|------|---------------------------------------|---------------------------|----------------------------------------------------------------------------------------------------------------------------------------------------------------------|------------------------------------------------------|
| WANG et al      | Anti-enterovirus 71 Effects of Chrysin and Its Phosphate Ester                                                 | China       | 2014 | PloS one                              | <i>In silico/In vitro</i> | Chrysin (5, 7-dihydroxyflavone, C15H10O4, Mr: 254.24), kaempferol (Kae, C15H10O6, Mr: 286.23) and diisopropyl chrysin-7-yl phosphate (CPI)                           | Enterovirus 71 (EV71)                                |
| ZHANG et al     | Apigenin Inhibits enterovirus-71 Infection by Disrupting Viral RNA Association With Trans-Acting Factors       | China       | 2014 | PloS one                              | <i>In vitro</i>           | Apigenin, Kaempferol, Hesperetin, Naringenin                                                                                                                         | Enterovirus 71 (EV71)                                |
| HUANG et al     | (-)-Epigallocatechin-3-gallate Inhibits Entry of Hepatitis B Virus Into Hepatocytes                            | Taiwan      | 2014 | Antiviral research                    | <i>In vitro</i>           | (-)-Epigallocatechin-3-gallate                                                                                                                                       | Hepatitis B virus (HBV)                              |
| SHIBATA et al   | The Flavonoid Apigenin Inhibits Hepatitis C Virus Replication by Decreasing Mature microRNA122 Levels          | Japan       | 2014 | Virology                              | <i>In vitro</i>           | (+)-Catechin (C), (-)-epicatechin (EC), (-)-epigallocatechin (EGC), (-)-epicatechin-3-gallate (ECG), (-)-epigallocatechin-3-gallate (EGCG), rutin, quercetin, chrysi | Hepatitis C virus (HCV)                              |
| WANG et al      | Inhibitory Effects of Pinus Massoniana Bark Extract on Hepatitis C Virus in Vitro                              | China       | 2015 | Pharmaceutical biology                | <i>In vitro</i>           | Extract from Pinus massoniana Lamb (Pinaceae).                                                                                                                       | Hepatitis C virus (HCV)                              |
| SONG et al      | Antiviral Activity of Chrysin Derivatives Against Coxsackievirus B3 in Vitro and in Vivo                       | South Korea | 2015 | Biomolecules & therapeutics           | <i>In vitro/In vivo</i>   | Chysin and synthesis of chrysin derivatives (2-11)                                                                                                                   | Coxsackievirus B3 (CVB3) enterovirus                 |
| Jl et al        | Antiviral Activity of Paulownia Tomentosa Against Enterovirus 71 of Hand, Foot, and Mouth Disease              | China       | 2015 | Biological & pharmaceutical bulletin  | <i>In vitro</i>           | Apigenin, naringenin and quercetin and extract from Paulownia tomentosa (THUNB.) STEUD.                                                                              | Enterovirus 71 (EV71) and coxsackievirus A16 (CAV16) |
| TRABOULSI et al | The Flavonoid Isoliquiritigenin Reduces Lung Inflammation and Mouse Morbidity During Influenza Virus Infection | Canada      | 2015 | Antimicrobial agents and chemotherapy | <i>In vitro/In vivo</i>   | Isoliquiritigenin ILG and ILG-p (fosfato) were synthesized by our group.                                                                                             | Influenza A (H1N1) virus                             |

|                  |                                                                                                                                                           |              |      |                                                         |                         |                                                                                                                                                                                                                 |                                   |
|------------------|-----------------------------------------------------------------------------------------------------------------------------------------------------------|--------------|------|---------------------------------------------------------|-------------------------|-----------------------------------------------------------------------------------------------------------------------------------------------------------------------------------------------------------------|-----------------------------------|
| ABDAL et al      | Antiviral Effect of Methylated Flavonol Isorhamnetin Against Influenza                                                                                    | South Korea  | 2015 | PloS one                                                | <i>In vitro/In vivo</i> | Quercetin, kaempferol, isorhamnetin, diosmetin, and eriodictyol                                                                                                                                                 | Influenza virus A (H1N1)          |
| LI et al         | The Antiviral Effect of Baicalin on Enterovirus 71 In Vitro                                                                                               | China        | 2015 | Viruses                                                 | <i>In vitro</i>         | Baicalin                                                                                                                                                                                                        | Enterovirus 71 (EV71)             |
| VARGAS et al     | A Network Flow Approach to Predict Protein Targets and Flavonoid Backbones to Treat Respiratory Syncytial Virus Infection                                 | Brazil       | 2015 | BioMed research international                           | <i>In silico</i>        | Resveratrol, quercetin, tricetin, apigenin, and myricetin                                                                                                                                                       | Respiratory syncytial virus (RSV) |
| CALLAND et al    | Polyphenols Inhibit Hepatitis C Virus Entry by a New Mechanism of Action                                                                                  | France       | 2015 | Journal of virology                                     | <i>In vitro</i>         | Epigallocatechin-3-gallate (EGCG), Gallocatechin-3-gallate (GCG), Delphinidin chloride, cyanidin chloride, myrtillin chloride, pelargonidin chloride, tricetinidin chloride, myricetin, and petunidin chloride. | Hepatitis C virus (HCV)           |
| MATHEW et al     | Computational Docking Study of p7 Ion Channel From HCV Genotype 3 and Genotype 4 and Its Interaction With Natural Compounds                               | Saudi Arabia | 2015 | PloS one                                                | <i>In silico</i>        | Epigallocatechin-3-gallate, Apigenin, Naringenin, Luteolin, Quercetin, Ladanein, and Silymarin.                                                                                                                 | Hepatitis C virus (HCV)           |
| RAJ et al        | Flavonoids as Multi-target Inhibitors for Proteins Associated With Ebola Virus: In Silico Discovery Using Virtual Screening and Molecular Docking Studies | India        | 2015 | Interdisciplinary sciences, computational life sciences | <i>In silico</i>        | Compound id's named ST059622 (Gossypetin), ST50903219, ST50940361, ST101866, ST078351 and ST060285 (Taxifolin)                                                                                                  | Ebola virus                       |
| ENKHTAIVAN et al | Anti-influenza (H1N1) Potential of Leaf and Stem Bark Extracts of Selected Medicinal Plants of South India                                                | South Korea  | 2015 | Saudi journal of biological sciences                    | <i>In vitro</i>         | Extracts from Strychnos minor, Diotacanthus albiflorus, Strychnos nux-vomica, Chloroxylon swietenia, and Cayratia pedata.                                                                                       | Influenza A (H1N1) virus          |

|                      |                                                                                                                                                                                                           |                          |      |                                |                           |                                                                                                                                                                                                                                                          |                                                                  |
|----------------------|-----------------------------------------------------------------------------------------------------------------------------------------------------------------------------------------------------------|--------------------------|------|--------------------------------|---------------------------|----------------------------------------------------------------------------------------------------------------------------------------------------------------------------------------------------------------------------------------------------------|------------------------------------------------------------------|
| QIAN et al           | Apigenin Restricts FMDV Infection and Inhibits Viral IRES Driven Translational Activity                                                                                                                   | China                    | 2015 | Viruses                        | <i>In vitro</i>           | Apigenin, baicalein, chrysin, liquiritigenin, quercetin, kaempferol and galangin.                                                                                                                                                                        | Foot-and-mouth virus                                             |
| THIRUVENGADA M et al | Induction of hairy roots by Agrobacterium rhizogenes-mediated transformation of spine gourd ( <i>Momordica dioica</i> Roxb. ex. Willd) for the assessment of phenolic compounds and biological activities | South Korea              | 2015 | Scientia horticulturae         | <i>In vitro</i>           | Extract from <i>Momordica dioica</i> Roxb. ex. Willd (Family: Cucurbitaceae).                                                                                                                                                                            | IBD virus                                                        |
| CHU et al            | Role of Baicalin in Anti-Influenza Virus A as a Potent Inducer of IFN-Gamma                                                                                                                               | China                    | 2015 | BioMed research international  | <i>In vitro/in vivo</i>   | Baicalin                                                                                                                                                                                                                                                 | Influenza A (H1N1) virus                                         |
| LIPSON et al         | Comparison of $\alpha$ -Glucosyl Hesperidin of Citrus Fruits and Epigallocatechin Gallate of Green Tea on the Loss of Rotavirus Infectivity in Cell Culture                                               | United States of America | 2015 | Frontiers in microbiology      | <i>In vitro</i>           | (-)-EGCG (epigallocatechin gallate) And semisynthetic $\alpha$ -glucosyl hesperitin (GH)                                                                                                                                                                 | Rotavirus                                                        |
| LI et al             | Flavonoids From <i>Matteuccia Struthiopteris</i> and Their Anti-influenza Virus (H1N1) Activity                                                                                                           | China                    | 2015 | Journal of natural products    | <i>In vitro</i>           | Extract from The rhizomes of <i>Matteuccia struthiopteris</i> (L.) Todar (Onocleaceae).                                                                                                                                                                  | Influenza A (H1N1) virus                                         |
| ZHONG et al          | Discovery of Metal Ions Chelator Quercetin Derivatives With Potent Anti-HCV Activities                                                                                                                    | China                    | 2015 | Molecules (Basel, Switzerland) | <i>In silico/In vitro</i> | 38 newly synthesized compounds, including quercetin (quercetin analogues)                                                                                                                                                                                | Hepatitis C virus (HCV)                                          |
| FUKUCHI et al        | Antiviral and Antitumor Activity of Licorice Root Extracts                                                                                                                                                | Japan                    | 2016 | In vivo (Athens, Greece)       | <i>In vitro</i>           | Flavonoid and chalcone derivatives (liquiritin apioside, liquiritigenin 7-apiosylglucoside, liquiritin, neoliquiritin, liquiritigenin, isoliquiritin apioside, licurazid, isoliquiritin, neoisoliquiritin, isoliquiritigenin); extracts of licorice root | Human immunodeficiency virus (HIV) or herpes simplex virus (HSV) |

|               |                                                                                                                         |         |      |                                                                                   |                         |                                                                                                                                                                   |                                                               |
|---------------|-------------------------------------------------------------------------------------------------------------------------|---------|------|-----------------------------------------------------------------------------------|-------------------------|-------------------------------------------------------------------------------------------------------------------------------------------------------------------|---------------------------------------------------------------|
|               |                                                                                                                         |         |      |                                                                                   |                         | and flavonoid-rich fraction of water extract of liquorice root.                                                                                                   |                                                               |
| QIU et al     | Prophylactic Efficacy of Quercetin 3-β-O-d-Glucoside Against Ebola Virus Infection                                      | Canada  | 2016 | Antimicrobial agents and chemotherapy                                             | <i>In vitro/in vivo</i> | Quercetin 3-β-O-d-glucoside (Q3G)                                                                                                                                 | Ebola virus, Sudan virus (SUDV), and Reston virus (RESTV)     |
| BAKR et al    | Phenolic profile of Centaurea aegyptiaca L. Growing in egypt and its cytotoxic and antiviral activities                 | Egypt   | 2016 | African journal of traditional, complementary, and alternative medicines : AJTCAM | <i>In vitro</i>         | Extract from Aerial parts of Centaurea aegyptiaca L (Centaurea, the fourth biggest genus in the family Asteraceae).                                               | Hepatitis A virus (HAV); Herpes simplex virus type 1 (HSV 1). |
| DERKSEN et al | Antiviral Activity of Hydroalcoholic Extract From Eupatorium Perfoliatum L. Against the Attachment of Influenza A Virus | Germany | 2016 | Journal of ethnopharmacology                                                      | <i>In vitro</i>         | Rutin; Hyperoside; Isoquercitrin; Trifolin; Astragalin; Eupafolin and Extract and fraction-rich from Dried Eupatorium perfoliatum herb (Lot 3458).                | Influenza A (H1N1) virus                                      |
| ÜRMÉNYI et al | Anti-HSV-1 and HSV-2 Flavonoids and a New Kaempferol Triglycoside From the Medicinal Plant Kalanchoe Daigremontiana     | Brazil  | 2016 | Chemistry & biodiversity                                                          | <i>In vitro</i>         | Kaempferol-3-O-β-D-xylopyranosyl (1→2)-α-L-rhamnopyranoside, Kd-AC-5-3 (ethyl acetate fraction); (1) Quercetin-3-O-β-D-xylopyranosyl (1→2)- α-L-rhamnopyranoside, | Herpes simplex virus types 1 and 2 (HSV-1 and HSV-2)          |

|                  |                                                                                                                                                    |         |      |                                                  |                         |                                                                                                                                |                                   |
|------------------|----------------------------------------------------------------------------------------------------------------------------------------------------|---------|------|--------------------------------------------------|-------------------------|--------------------------------------------------------------------------------------------------------------------------------|-----------------------------------|
| KARIMI et al     | Anti-adenovirus Activity, Antioxidant Potential, and Phenolic Content of Black Tea ( <i>Camellia Sinensis</i> Kuntze) Extract                      | Iran    | 2016 | Journal of complementary & integrative medicine  | <i>In vitro</i>         | Black tea from <i>Camellia sinensis</i> .                                                                                      | Adenovirus (ADV)                  |
| FAN et al        | Antiviral Activity of Luteolin Against Japanese Encephalitis Virus                                                                                 | China   | 2016 | Virus research                                   | <i>In vitro</i>         | Luteolin                                                                                                                       | Japanese encephalitis virus (JEV) |
| GRIENKE et al    | Discovery of Prenylated Flavonoids With Dual Activity Against Influenza Virus and Streptococcus Pneumoniae                                         | Austria | 2016 | Scientific reports                               | <i>In vitro</i>         | Sanggenon B, sanggenon C, sanggenon D, sanggenon G, sanggenol A, kuwanon L (6), and the 1:1 mixture of moracin O and moracin P | Influenza A (H1N1) virus          |
| DU et al         | Inhibition of Dengue Virus Replication by Diisopropyl chrysin-7-yl Phosphate                                                                       | China   | 2016 | Science China. Life sciences                     | <i>In vitro</i>         | Diisopropylchrysin-7-yl phosphate (CPI)                                                                                        | Dengue virus (DENV)               |
| GALOCHKINA et al | Virus-inhibiting Activity of Dihydroquercetin, a Flavonoid From <i>Larix Sibirica</i> , Against Coxsackievirus B4 in a Model of Viral Pancreatitis | Russia  | 2016 | Archives of virology                             | <i>In vitro/in vivo</i> | Dihydroquercetin (taxifolin, DHQ) (2,3-dihydro-3,5,7-trihydroxy-2-(3,4-dihydroxyphenyl)-4H-1-benzopyran-4-one                  | Coxsackie virus B4 (CVB4)         |
| ROJAS et al      | Effect of Quercetin on Hepatitis C Virus Life Cycle: From Viral to Host Targets                                                                    | Spain   | 2016 | Scientific reports                               | <i>In vitro</i>         | Quercetin                                                                                                                      | Hepatitis C virus (HCV)           |
| WU et al         | Luteolin Inhibits Epstein-Barr Virus Lytic Reactivation by Repressing the Promoter Activities of Immediate-Early Genes                             | Taiwan  | 2016 | Antiviral research                               | <i>In vitro</i>         | Luteolin                                                                                                                       | Epstein-Barr virus (EBV)          |
| AURORI et al     | Bay Laurel ( <i>Laurus Nobilis</i> ) as Potential Antiviral Treatment in Naturally BQCV Infected Honeybees                                         | Romania | 2016 | Virus research                                   | <i>In vitro/in vivo</i> | <i>L. nobilis</i> ethanolic extracts. Dry <i>Laurus nobilis</i> leaves of Greek origin.                                        | Black queen cell virus (BQCV)     |
| KERL et al       | Total Synthesis of the Antiviral Natural Product Houttuynoid B                                                                                     | Germany | 2016 | Chemistry (Weinheim an der Bergstrasse, Germany) | <i>In silico</i>        | Synthesis of houttuynoid B                                                                                                     | Herpes simplex virus              |

|                  |                                                                                                                                                   |             |      |                                  |                         |                                                                                          |                                        |
|------------------|---------------------------------------------------------------------------------------------------------------------------------------------------|-------------|------|----------------------------------|-------------------------|------------------------------------------------------------------------------------------|----------------------------------------|
| TSUKADA et al    | A new class of hepatitis B and D virus entry inhibitors, proanthocyanidin and its analogs, that directly act on the viral large surface proteins. | Japan       | 2017 | Hepatology                       | <i>In vitro</i>         | Procyanidin B1, Proanthocyanidin, Oolonghomobisflavan C                                  | Hepatitis B virus (HBV)                |
| CHEN et al       | Treatment effect of a flavonoid prescription on duck virus hepatitis by its hepatoprotective and antioxidative ability.                           | China       | 2017 | Pharm. Biol.                     | <i>In vivo/in vitro</i> | Baicalin, linarin, icariin and notoginsenoside R1                                        | Duck Hepatitis A Virus Type 1 (DHAV-1) |
| FRABASILE et al  | The citrus flavanone naringenin impairs dengue virus replication in human cells.                                                                  | Brazil      | 2017 | Scientific Reports               | <i>In vitro</i>         | Naringenin                                                                               | Dengue virus (DENV)                    |
| CHEN et al       | Anti-DHAV-1 reproduction and immunoregulatory effects of a flavonoid prescription on duck virus hepatitis.                                        | China       | 2017 | Pharm. Biol.                     | <i>In vitro/in vivo</i> | Baicalin, linarin, icariin and notoginsenoside R1                                        | Duck Hepatitis A Virus Type 1 (DHAV-1) |
| SEO & CHOI et al | Inhibitory mechanism of five natural flavonoids against murine norovirus.                                                                         | South Korea | 2017 | Phytomedicine                    | <i>In vitro</i>         | Epigallocatechin gallate (EGCG), epicatechin gallate (ECG), quercetin, daidzein, fisetin | Murine norovirus                       |
| LI et al         | Anti-herpes simplex virus type 1 activity of Houttuynoid A, a flavonoid from Houttuynia cordata Thunb.                                            | China       | 2017 | Antiviral Research               | <i>In vitro/in vivo</i> | Houttuynoid and extracts from Houttuynia cordata Thunb. (Saururaceae)                    | Herpes Simplex Virus-1 (HSV-1)         |
| DOS SANTOS et al | In vitro antiherpes effect of C-glycosyl flavonoid enriched fraction of Cecropia glaziovii encapsulated in PLGA nanoparticles.                    | Brazil      | 2017 | Mater Sci Eng C Mater Biol Appl. | <i>In vitro</i>         | Freeze-dried enriched flavonoid fraction                                                 | Herpes simplex virus 1 (HSV-1)         |
| BANG et al       | Anti-influenza effect of the major flavonoids from Salvia plebeia R.Br. via inhibition of influenza H1N1 virus neuraminidase.                     | South Korea | 2018 | Natural Products Research        | <i>In vitro</i>         | 6-hydroxyluteolin 7-O- $\beta$ -d-glucoside (1), nepitrin (2), homoplantagin (3)         | Influenza A (H1N1) virus               |

|               |                                                                                                                                           |             |      |                              |                         |                                                                                                                                                                                                                                                                                                                                                                                                                                                                                      |                                        |
|---------------|-------------------------------------------------------------------------------------------------------------------------------------------|-------------|------|------------------------------|-------------------------|--------------------------------------------------------------------------------------------------------------------------------------------------------------------------------------------------------------------------------------------------------------------------------------------------------------------------------------------------------------------------------------------------------------------------------------------------------------------------------------|----------------------------------------|
| BRANDÃO et al | Antiviral Activity of <i>Fridericia formosa</i> (Bureau) L. G. Lohmann (Bignoniaceae) Extracts and Constituents.                          | Brazil      | 2017 | Journal of Tropical Medicine | <i>In vitro</i>         | Mangiferin (1; 2-β-D-Glucopyranosyl-1,3,6,7-tetrahydroxy-9H-xanthen-9-one). 2'-O-trans-caffeoylmangiferin (2; 2-(2'-O-trans-caffeoyl)-C-β-D-glucopyranosyl-1,3,6,7-tetrahydroxyxanthone). 2'-O-trans-coumaroylmangiferin (3; 2-(2'-O-trans-coumaroyl)-C-β-D-glucopyranosyl-1,3,6,7-tetrahydroxyxanthone). Chrysin (4; 5,7-Dihydroxy-2-phenyl-4H-1-benzopyran-4-one). 2'-O-trans-cinnamoylmangiferin (5; 2-(2'-O-trans-cinnamoyl)-C-β-D-glucopyranosyl-1,3,6,7-tetrahydroxyxanthone); | Herpes Simplex Virus-1 (HSV-1)         |
| BOSE et al    | Identification of a flavonoid isolated from plum ( <i>Prunus domestica</i> ) as a potent inhibitor of Hepatitis C virus entry.            | India       | 2017 | Scientific Reports           | <i>In vitro/ex vivo</i> | Rutin and different crude extracts from plum ( <i>Prunus domestica</i> ).                                                                                                                                                                                                                                                                                                                                                                                                            | Hepatitis C virus (HCV)                |
| HUH et al     | C-Methylated Flavonoid Glycosides from <i>Pentarhizidium orientale</i> Rhizomes and Their Inhibitory Effects on the H1N1 Influenza Virus. | South Korea | 2017 | Journal of Natural Products  | <i>In vitro</i>         | 13 C-methylated flavonoid glycosides (1–13), along with 15 previously known flavonoids (14–28), (including naringenin)                                                                                                                                                                                                                                                                                                                                                               | Influenza A (H1N1)                     |
| ORTEGA et al  | The role of the glycosyl moiety of myricetin derivatives in anti-HIV-1 activity in vitro.                                                 | Venezuela   | 2017 | AIDS Res Ther.               | <i>In vitro</i>         | Myricetin 3-rhamnoside and myricetin 3-(6-rhamnosylgalactoside)                                                                                                                                                                                                                                                                                                                                                                                                                      | Human immunodeficiency virus 1 (HIV-1) |

|                      |                                                                                                                                                                                       |             |      |                             |                           |                                                 |                                                 |
|----------------------|---------------------------------------------------------------------------------------------------------------------------------------------------------------------------------------|-------------|------|-----------------------------|---------------------------|-------------------------------------------------|-------------------------------------------------|
| JIN et al            | Oroxylin A suppresses influenza A virus replication correlating with neuraminidase inhibition and induction of IFNs.                                                                  | China       | 2018 | Biomed Pharmacother. 2      | <i>In vitro</i>           | Oroxylin A                                      | Influenza A                                     |
| LI et al             | Houttuynoid M, an Anti-HSV Active Houttuynoid from Houttuynia cordata Featuring a Bis-houttuynin Chain Tethered to a Flavonoid Core.                                                  | China       | 2017 | Journal of Natural Products | <i>In vitro/in vivo</i>   | Houttuynoid M (1) and houttuynoid A (2)         | Herpes Simplex virus (HSV-2)                    |
| SHIMIZU et al        | Flavonoids from Pterogyne nitens Inhibit Hepatitis C Virus Entry.                                                                                                                     | Brazil      | 2017 | Scientific Reports          | <i>In vitro</i>           | Sorbifolin (1) and pedaltin (2)                 | Hepatitis C virus (HCV)                         |
| LIM et al            | Inhibitory effect of flavonoids against NS2B-NS3 protease of ZIKA virus and their structure activity relationship                                                                     | South Korea | 2017 | Biotechnol Lett             | <i>In vitro</i>           | 22 flavonoids                                   | Zika Virus (ZIKV)                               |
| SCHIAVONI et al      | CD38 modulates respiratory syncytial virus-driven proinflammatory processes in human monocyte-derived dendritic cells.                                                                | Italy       | 2018 | Immunology                  | <i>In vitro</i>           | Kuromanin                                       | Human respiratory syncytial virus type A2 (RSV) |
| KANNAN & KOLANDAIVEL | The inhibitory performance of flavonoid cyanidin-3-sambubioside against H274Y mutation in H1N1 influenza virus.                                                                       | India       | 2018 | J biomol struct dyn         | <i>In silico</i>          | Cyanidin-3-sambubioside                         | Influenza A (H1N1) virus                        |
| MIN et al            | A flavonoid compound library screen revealed potent antiviral activity of plant-derived flavonoids on human enterovirus A71 replication.                                              | Singapore   | 2018 | Antiviral Research          | <i>In vitro</i>           | ST077124 (10mg) and ST024734 (10mg)             | Enterovirus 71 (EV71)                           |
| ANUSUYA & GROMIHA    | Structural basis of flavonoids as dengue polymerase inhibitors: insights from QSAR and docking studies.                                                                               | Japan       | 2019 | J biomol struct dyn         | <i>In silico</i>          | 33 flavonoids                                   | Dengue virus (DENV)                             |
| VALENZUELA et al     | Alpinone exhibited immunomodulatory and antiviral activities in Atlantic salmon.                                                                                                      | Chile       | 2018 | Fish Shellfish Immunol.     | <i>In vitro</i>           | Alpinone and Pinocembrine                       | Infectious Salmon Anemia virus.                 |
| LIU et al            | In vitro anti-influenza virus effect of total flavonoid from Trollius ledebouri Reichb.                                                                                               | China       | 2018 | J Int Med Res               | <i>In vitro</i>           | Extract from Trollius ledebouri Reichb (TFTLR). | Influenza A (H1N1 and H3N2) virus               |
| FERREIRA et al       | Detection of the antiviral activity of epicatechin isolated from Salacia crassifolia (Celastraceae) against Mayaro virus based on protein C homology modelling and virtual screening. | Brazil      | 2018 | Archives of Virology        | <i>In silico/In vitro</i> | Epicatechin                                     | Mayaro virus (MAYV)                             |
| SEONG, KIM & SHIN    | Wogonin, a flavonoid isolated from Scutellaria baicalensis, has anti-viral activities against                                                                                         | South Korea | 2017 | Acta Virology               | <i>In vitro</i>           | Wogonin                                         | Influenza A and B                               |



|                                                      |                                                                                                                                                                                    |          |      |                           |                  |                                                                                                                                                                                                                                                                                                                                                                 |                                                 |
|------------------------------------------------------|------------------------------------------------------------------------------------------------------------------------------------------------------------------------------------|----------|------|---------------------------|------------------|-----------------------------------------------------------------------------------------------------------------------------------------------------------------------------------------------------------------------------------------------------------------------------------------------------------------------------------------------------------------|-------------------------------------------------|
| influenza infection via modulation of AMPK pathways. |                                                                                                                                                                                    |          |      |                           |                  |                                                                                                                                                                                                                                                                                                                                                                 |                                                 |
| GAUDRY et al                                         | The Flavonoid Isoquercitrin Precludes Initiation of Zika Virus Infection in Human Cells.                                                                                           | France   | 2018 | Int J Mol Sci             | <i>In vitro</i>  | Isoquercitrin (quercetin-3-O-glucoside or Q3G), hyperoside, kaempferol, and quercetin                                                                                                                                                                                                                                                                           | Zika Virus (ZIKV)                               |
| SARWAR et al                                         | Structure activity relationship (SAR) and quantitative structure activity relationship (QSAR) studies showed plant flavonoids as potential inhibitors of dengue NS2B-NS3 protease. | Pakistan | 2018 | BMC Struct Biol           | <i>In silico</i> | More than 100 chemical structures of ligand flavonoid molecules                                                                                                                                                                                                                                                                                                 | Dengue virus (DENV)                             |
| GHOKE et al                                          | Evaluation of antiviral activity of Ocimum sanctum and Acacia arabica leaves extracts against H9N2 virus using embryonated chicken egg model.                                      | India    | 2018 | BMC Complement Altern Med | <i>In vitro</i>  | Extracts derived from leaves of Acacia arabica.                                                                                                                                                                                                                                                                                                                 | Influenza H9N2                                  |
| KERAMAGI & SKARIYACHAN                               | Prediction of binding potential of natural leads against the prioritized drug targets of chikungunya and dengue viruses by computational screening.                                | India    | 2018 | 3 Biotech                 | <i>In silico</i> | 107 compounds from 43 medicinal plants                                                                                                                                                                                                                                                                                                                          | Chikungunya virus (CHIKV) e Dengue virus (DENV) |
| HAWAS et al                                          | In vitro inhibition of Hepatitis C virus protease and antioxidant by flavonoid glycosides from the Saudi costal plant Sarcocornia fruticosa.                                       | Egypt    | 2019 | Natural Products Research | <i>In vitro</i>  | Rhamnazin 3-O-rutinoside (2), rhamnazin 3-O-(6"-O- $\alpha$ -rhamnosyl)- $\beta$ -galactoside (3), isorhamnetin 3-O-(6"-O- $\alpha$ rhamnosyl)- $\beta$ -galactoside (4), isorhamnetin 3-O-(2",6"-O- $\alpha$ -di-rhamnosyl)- $\beta$ -galactoside (5), and isorhamnetin (6) and allantoin (7); Extracts from leaves of the costal plant Sarcocornia fruticosa. | Hepatitis C virus (HCV)                         |

|                            |                                                                                                                                                                          |             |      |                                    |                           |                                                                                                                                                                       |                                                                              |
|----------------------------|--------------------------------------------------------------------------------------------------------------------------------------------------------------------------|-------------|------|------------------------------------|---------------------------|-----------------------------------------------------------------------------------------------------------------------------------------------------------------------|------------------------------------------------------------------------------|
| HÚS et al                  | Phenanthrenes from Juncus Compressus Jacq. with Promising Antiproliferative and Anti-HSV-2 Activities.                                                                   | Hungarian   | 2018 | Molecules                          | <i>In vitro</i>           | Apigenin and luteolin                                                                                                                                                 | Herpes Simplex virus (HSV-2)                                                 |
| KHALIL et al               | Guava flavonoid glycosides prevent influenza A virus infection via rescue of P53 activity.                                                                               | Egypt       | 2019 | J Med Virol                        | <i>In silico/In vitro</i> | Guava extracts and Guava flavonoid glycosides (GFGs) derivatives from leaves extract from green leaves and flowers of guava (Psidium guajava) and lemon (Citrus spp). | Influenza A                                                                  |
| GONZÁLES-BÚRGEZ et al.     | Comparison between In Vitro Antiviral Effect of Mexican Propolis and Three Commercial Flavonoids against Canine Distemper Virus.                                         | Mexico      | 2018 | Evid Based Complement Alternat Med | <i>In vitro</i>           | Quercetin, naringenin, and pinocembrin and a flavonoids mixture; Ethanolic Extract of Mexican propolis (EEP).                                                         | Canine Distemper Virus (CDV),                                                |
| MATHEW, AL THANI & YASSINE | Computational screening of known broad-spectrum antiviral small organic molecules for potential influenza HA stem inhibitors.                                            | Qatar       | 2018 | PLoS One                           | <i>In silico</i>          | In our in silico docking analysis, 100 natural bioactive flavonoids were initially docked                                                                             | Influenza A                                                                  |
| WOLFF et al                | Comprehensive characterisation of polyphenols in leaves and stems of three anti-dengue virus type-2 active Brazilian Faramaea species (Rubiaceae) by HPLC-DAD-ESI-MS/MS. | Brazil      | 2019 | Phytochem Anal                     | <i>In vitro</i>           | Extracts from species F. bahiensis; The species F. truncata; The species F. hyacinthina; Flavonoid glycosides, including kaempferol, quercetin, apigenin, acacetin.   | Dengue virus 2 (DENV2)                                                       |
| ZHONG et al                | Santin inhibits influenza A virus replication through regulating MAPKs and NF-κB pathways.                                                                               | China       | 2019 | J Asian Nat Prod Res               | <i>In vitro</i>           | Santin                                                                                                                                                                | Influenza A                                                                  |
| KIM et al                  | Cycloartane-type triterpenoid derivatives and a flavonoid glycoside from the burs of Castanea crenata.                                                                   | South Korea | 2019 | Phytochemistry                     | <i>In vitro</i>           | Kaempferol-3-O-[3"-acetyl-2",6"-di-E-p-coumaroyl]-β-Dglucopyranoside (16)                                                                                             | Human Rhinovirus (HRV1B), coxsackievirus B3 (CVB3), Influenza A (H1N1) virus |

|              |                                                                                                                                    |                          |      |                                    |                         |                                                                                                                                                                                                                                                          |                                      |
|--------------|------------------------------------------------------------------------------------------------------------------------------------|--------------------------|------|------------------------------------|-------------------------|----------------------------------------------------------------------------------------------------------------------------------------------------------------------------------------------------------------------------------------------------------|--------------------------------------|
| XU et al     | Endonuclease Activity Inhibition of the NS1 Protein of Parvovirus B19 as a Novel Target for Antiviral Drug Development.            | United States of America | 2019 | Antimicrob Agents Chemother.       | <i>In vitro</i>         | 357 compounds                                                                                                                                                                                                                                            | Human Parvovirus B19V                |
| SADATI et al | Docking study of flavonoid derivatives as potent inhibitors of influenza H1N1 virus neuraminidase.                                 | Iran                     | 2019 | Biomed Rep.                        | <i>In silico</i>        | Quercetin, catechin, naringenin, luteolin, hispidulin, vitexin, chrysin and kaempferol                                                                                                                                                                   | Influenza A (H1N1) virus             |
| ÁY et al     | Flavonol 7-O-Glucoside Herbacitrin Inhibits HIV-1 Replication through Simultaneous Integrase and Reverse Transcriptase Inhibition. | Hungarian                | 2019 | Evid Based Complement Alternat Med | <i>In vitro</i>         | Herbacitrin, gossypitrin and quercetin                                                                                                                                                                                                                   | Human Immunodeficiency Virus (HIV-1) |
| YIN et al    | An antiviral drug screening system for enterovirus 71 based on an improved plaque assay: A potential high-throughput method.       | China                    | 2019 | J Med Virol                        | <i>In vitro</i>         | Nobiletin; kaempferol; morin hydrate; myricetin; taxifolin; baicalin; formononetin; diosmetin; dihydromyricetin                                                                                                                                          | Enterovirus 71 (EV-A71)              |
| LIN et al.   | Phloretin inhibits Zika virus infection by interfering with cellular glucose utilisation.                                          | United States of America | 2019 | Int J Antimicrob Agents            | <i>In vitro</i>         | Phloretin                                                                                                                                                                                                                                                | Zika Virus (ZIKV)                    |
| CHEN et al   | Assessment of the Effect of Baicalin on Duck Virus Hepatitis.                                                                      | China                    | 2019 | Curr Mol Med                       | <i>In vitro/in vivo</i> | Baicalin                                                                                                                                                                                                                                                 | Duck Virus Hepatitis                 |
| LEE et al    | Antiviral activity of pinocembrin against Zika virus replication.                                                                  | Singapore                | 2019 | Antiviral Research                 | <i>In vitro</i>         | Pinocembrin                                                                                                                                                                                                                                              | Zika Virus (ZIKV)                    |
| DAI et al    | Antiviral Efficacy of Flavonoids against Enterovirus 71 Infection in Vitro and in Newborn Mice.                                    | China                    | 2019 | Viruses                            | <i>In vitro/in vivo</i> | Apigenin, luteolin, diosmetin, tangeretin, nobiletin, galangin, kaempferol, quercetin, myricetin, isorhamnetin, silibinin, liquiritigenin, bavachinin, taxifolin, dihydromyricetin, daidzein, formononetin, epicatechin, chrysosplenetin, and penduletin | Enterovirus 71 (EV-A71)              |

|                  |                                                                                                                    |              |      |                                               |                           |                                                                                        |                                                              |
|------------------|--------------------------------------------------------------------------------------------------------------------|--------------|------|-----------------------------------------------|---------------------------|----------------------------------------------------------------------------------------|--------------------------------------------------------------|
| LEE et al        | Antiviral activity of ST081006 against the dengue virus.                                                           | Singapore    | 2019 | Antiviral Research                            | <i>In vitro</i>           | ST081006, a synthetic flavonoid                                                        | Dengue virus (DENV)                                          |
| JO et al         | Characteristics of flavonoids as potent MERS-CoV 3C-like protease inhibitors.                                      | South Korea  | 2019 | Chem Biol Drug Des                            | <i>In silico/In vitro</i> | Herbacetin, isobavachalcone, quercetin 3- $\beta$ -d-glucoside e helichrysetin         | Middle East respiratory syndrome (MERS) Coronaviruses (CoVs) |
| AKHER et al      | Discovery of novel natural flavonoids as potent antiviral candidates against hepatitis C virus NS5B polymerase.    | South Africa | 2019 | Med Hypotheses                                | <i>In silico</i>          | 43 natural flavonoids                                                                  | Hepatitis C virus (HCV)                                      |
| FATEEVA et al    | Experimental Study of Flakozid Activity in Viral Hepatitis C In Vitro                                              | Russia       | 2019 | Bulletin of Experimental Biology and Medicine | <i>In vitro</i>           | Flakosid                                                                               | Hepatitis C virus (HCV)                                      |
| LI & WANG        | Baicalin inhibits influenza virus A replication via activation of type I IFN signaling by reducing miR-146a.       | China        | 2019 | Mol Med Rep                                   | <i>In vitro/in vivo</i>   | Baicalin                                                                               | Influenza A                                                  |
| LIU et al        | Therapeutic effect of Xanthohumol against highly pathogenic porcine reproductive and respiratory syndrome viruses. | China        | 2019 | Vet Microbiol                                 | <i>In vitro</i>           | Xanthohumol                                                                            | Porcine reproductive and respiratory syndrome virus (PRRSV)  |
| GUNASEELAN et al | Prunin suppresses viral IRES activity and is a potential candidate for treating enterovirus A71 infection.         | Singapore    | 2019 | Sci Transl Med                                | <i>In silico/in vitro</i> | Prunin                                                                                 | Enterovirus 71 (EV-A71)                                      |
| BASIC et al      | A synthetic derivative of houttuynoid B prevents cell entry of Zika virus.                                         | Germany      | 2019 | Antiviral Research                            | <i>In vitro</i>           | Two synthetic houttuynoids TK1023 and TK1024 from the Chinese plant Houttuynia cordata | Zika Virus (ZIKV)                                            |
| CANTANEO et al   | The citrus flavonoid naringenin impairs the in vitro infection of human cells by Zika virus.                       | Brazil       | 2019 | Scientific Reports                            | <i>In silico/In vitro</i> | Naringenin                                                                             | Zika Virus (ZIKV)                                            |
| LOPES et al      | Quercetin pentaacetate inhibits in vitro human respiratory syncytial virus adhesion.                               | Brazil       | 2020 | Virus Research                                | <i>In silico/In vitro</i> | Quercetin (2-(3,4-dihydroxyphenyl)-3,5,7-trihydroxychromen-4-                          | Orthopneumovirus / Respiratory syncytial virus (RSV)         |

|                  |                                                                                                                                                          |             |      |                         |                                   |                                                                                                                                                                                                                                                                                      |                                                         |
|------------------|----------------------------------------------------------------------------------------------------------------------------------------------------------|-------------|------|-------------------------|-----------------------------------|--------------------------------------------------------------------------------------------------------------------------------------------------------------------------------------------------------------------------------------------------------------------------------------|---------------------------------------------------------|
|                  |                                                                                                                                                          |             |      |                         |                                   | one) and Quercetin pentaacetate                                                                                                                                                                                                                                                      |                                                         |
| JO et al         | Inhibition of SARS-CoV 3CL protease by flavonoids.                                                                                                       | South Korea | 2020 | J Enzyme Inhib Med Chem | <i>In silico</i>                  | Herbacetin, rhoifolin and pectolinarin                                                                                                                                                                                                                                               | Severe respiratory syndrome (SARS-Cov)                  |
| DE FREITAS et al | Agathisflavone, a Biflavonoid from Anacardium occidentale L., Inhibits Influenza Virus Neuraminidase.                                                    | Brazil      | 2020 | Curr Top Med Chem       | <i>In vitro</i>                   | Agathisflavone                                                                                                                                                                                                                                                                       | Influenza Virus                                         |
| TSAI et al       | Bioactive constituents of Lindernia crustacea and its anti-EBV effect via Rta expression inhibition in the viral lytic cycle.                            | Taiwan      | 2020 | J Ethnopharmacol        | <i>In vitro</i>                   | Apigenin, apigenin-7-O- $\beta$ -D-glucopyranoside, luteolin-7-O- $\beta$ -D-glucopyranoside, apigenin-7-O-[[ $\beta$ -D-apiofuranosyl (1 $\rightarrow$ 6)- $\beta$ -D-glucopyranoside], apigenin-7-O-[ $\alpha$ -L-rhamnopyranosyl (1 $\rightarrow$ 2)- $\beta$ -D-glucopyranoside] | Epstein-Barr Virus (EBV)                                |
| LING et al       | Flavonoids from Houltuynia cordata attenuate H1N1-induced acute lung injury in mice via inhibition of influenza virus and Toll-like receptor signalling. | China       | 2020 | Phytomedicine           | <i>In vitro/in vivo</i>           | Rutin, hyperin, isoquercitrin and quercitrin; Extract from Houltuynia cordata Thunb. (Saururaceae).                                                                                                                                                                                  | Influenza A (H1N1) virus                                |
| CARE et al       | Discordant Activity of Kaempferol Towards Dengue Virus and Japanese Encephalitis Virus.                                                                  | Thailand    | 2020 | Molecules               | <i>In vitro</i>                   | Kaempferol                                                                                                                                                                                                                                                                           | Japanese encephalitis virus (JEV) e Dengue Virus (DENV) |
| LI et al         | Inhibition of herpes simplex virus by myricetin through targeting viral gD protein and cellular EGFR/PI3K/Akt pathway.                                   | China       | 2020 | Antiviral Research      | <i>In vitro/in vivo/in silico</i> | Myricetin                                                                                                                                                                                                                                                                            | Herpes Simplex Virus (HSV-2)                            |
| ZOU et al        | Structure-activity relationship of flavonoid bifunctional inhibitors against zika virus infection.                                                       | China       | 2020 | Biochem Pharmacol       | <i>In vitro</i>                   | Galangin, kaempferide, myricetin, quercetin, dihydromyricetin,                                                                                                                                                                                                                       | Zika Virus (ZIKV)                                       |

| trifloroside and epigallocatechin gallate (EGCG) |                                                                                                                                                                  |                          |      |                         |                           |                                                       |                                                |
|--------------------------------------------------|------------------------------------------------------------------------------------------------------------------------------------------------------------------|--------------------------|------|-------------------------|---------------------------|-------------------------------------------------------|------------------------------------------------|
| YU et al                                         | Computational screening of antagonists against the SARS-CoV-2 (COVID-19) coronavirus by molecular docking                                                        | China                    | 2020 | Int J Antimicrob Agents | <i>In silico</i>          | Luteolin                                              | Severe respiratory syndrome 2 (SARS-Cov-2)     |
| NGWA et al                                       | Potential of Flavonoid-Inspired Phytomedicines against COVID-19                                                                                                  | United States of America | 2020 | Molecules               | <i>In silico/In vitro</i> | Hesperetin, Myricetin, Linebacker, Caflanone, Equivir | Severe respiratory syndrome 2 (SARS-Cov-2)     |
| TIAN et al                                       | Dihydromyricetin is a new inhibitor of influenza polymerase PB2subunit and influenza-induced inflammation                                                        | China                    | 2020 | Microbes and Infection  | <i>In silico/In vitro</i> | Dihydromyricetin                                      | Influenza A (H1N1) virus                       |
| HAMZA et al                                      | nCOV-19 peptides mass fingerprinting identification, binding, and blocking of inhibitors flavonoids and anthraquinone of Moringa oleifera and hydroxychloroquine | Pakistan                 | 2020 | J biomol struct dyn     | <i>In silico</i>          | Kaempferol                                            | Severe respiratory syndrome 2 (SARS-Cov-2)     |
| KHANDELWAL et al                                 | Antiviral activity of Apigenin against buffalopox: Novel mechanistic insights and drug-resistance considerations                                                 | India                    | 2020 | Antiviral research      | <i>In vitro/In vivo</i>   | Apigenin                                              | Buffalopox virus (BPXV)                        |
| CHU et al                                        | Wogonin inhibits in vitro herpes simplex virus type 1 and 2 infection by modulating cellular NF-κB and MAPK pathways                                             | China                    | 2020 | BMC Microbiol           | <i>In vitro</i>           | Wogonin                                               | Herpes simplex virus 1 and 2 (HSV-1 and HSV-2) |
| JO et al                                         | Flavonoids with inhibitory activity against SARS-CoV-2 3CLpro                                                                                                    | South Korea              | 2020 | J Enzyme Inhib Med Chem | <i>In silico/In vitro</i> | 70 flavonoids                                         | Severe respiratory syndrome 2 (SARS-Cov-2)     |
| XU et al                                         | Apigenin suppresses influenza A virus-induced RIG-I activation and viral replication                                                                             | China                    | 2020 | J Med Virol             | <i>In vitro</i>           | Apigenin                                              | Influenza A (H1N1) virus                       |
| HONG et al                                       | Morin Hydrate Inhibits Influenza Virus entry into Host Cells and Has Anti-inflammatory Effect in Influenza-infected Mice                                         | South Korea              | 2020 | Immune Netw.            | <i>In vitro/In vivo</i>   | Morin hydrate                                         | Influenza A (H1N1) virus                       |
| MENDES et al                                     | The anti-Zika virus and anti-tumoral activity of the citrus flavanone lipophilic naringenin-based compounds                                                      | Brazil                   | 2020 | Chem Biol Interact      | <i>In vitro</i>           | Narigenin derivatives                                 | Zika Virus (ZIKV)                              |

|                             |                                                                                                                                                                           |              |      |                          |                         |                                                                                                                                                                          |                                               |
|-----------------------------|---------------------------------------------------------------------------------------------------------------------------------------------------------------------------|--------------|------|--------------------------|-------------------------|--------------------------------------------------------------------------------------------------------------------------------------------------------------------------|-----------------------------------------------|
| BOONYASUPPAY<br>AKORN et al | Dibromopinocembrin and Dibromopinostrobin Are Potential Anti-Dengue Leads with Mild Animal Toxicity                                                                       | Thailand     | 2020 | Molecules                | <i>In vitro/In vivo</i> | Modified flavanones, pinocembrin and pinostrobin                                                                                                                         | Dengue Virus 2 (DENV2)                        |
| KWON et al                  | Protective Effect of Flavonoids from Ohwia caudata against Influenza a Virus Infection                                                                                    | South Korea  | 2020 | Molecules                | <i>In vitro</i>         | 2'-hydroxyl yokovanol, 2'-hydroxyl neophellamuretin, yokovanol, swertisin, spinosin, and 7-methyl-apigenin-6-C- $\beta$ -glucopyranosyl 2''-O- $\beta$ -d-xylopyranoside | Influenza A (H1N1) virus                      |
| LI et al                    | Inhibitory Activity of Honeysuckle Extracts against Influenza A Virus In Vitro and In Vivo                                                                                | China        | 2020 | Virol. Sin.              | <i>In vitro/In vivo</i> | Honeysuckle flavonoid-rich fraction                                                                                                                                      | Influenza A (H1N1, H3N2 and H1N1-H275Y) virus |
| BASU, SARKAR and MAULIK     | Molecular docking study of potential phytochemicals and their effects on the complex of SARS-CoV2 spike protein and human ACE2                                            | India        | 2020 | Sci Rep                  | <i>In silico</i>        | Hesperidin and Chrysin                                                                                                                                                   | Severe respiratory syndrome 2 (SARS-Cov-2)    |
| MANDOUR, ZLOTOS and SALEM   | A multi-stage virtual screening of FDA-approved drugs reveals potential inhibitors of SARS-CoV-2 main protease                                                            | Egypt        | 2020 | J biomol struct dyn      | <i>In silico</i>        | Rutin                                                                                                                                                                    | Severe respiratory syndrome 2 (SARS-Cov-2)    |
| RAMESHKUMAR et al           | Computational selection of flavonoid compounds as inhibitors against SARS-CoV-2 main protease, RNA-dependent RNA polymerase and spike proteins: A molecular docking study | Saudi Arabia | 2020 | Saudi J Biol Sci.        | <i>In silico</i>        | 458 flavonoids                                                                                                                                                           | Severe respiratory syndrome 2 (SARS-Cov-2)    |
| ZHOU et al                  | Anti-HSV-1 effect of dihydromyricetin from Ampelopsis grossedentata via the TLR9-dependent anti-inflammatory pathway                                                      | China        | 2020 | J Glob Antimicrob Resist | <i>In vitro</i>         | Dihydromyricetin                                                                                                                                                         | Herpes simplex virus 1 (HSV-1)                |
| GOGOI et al                 | Computational guided identification of a citrus flavonoid as potential inhibitor of SARS-CoV-2 main protease                                                              | India        | 2020 | Mol Divers               | <i>In silico</i>        | 44 citrus flavonoids                                                                                                                                                     | Severe respiratory syndrome 2 (SARS-Cov-2)    |

|                                 |                                                                                                                                                                           |                          |      |                                   |                           |                                                                                               |                                            |
|---------------------------------|---------------------------------------------------------------------------------------------------------------------------------------------------------------------------|--------------------------|------|-----------------------------------|---------------------------|-----------------------------------------------------------------------------------------------|--------------------------------------------|
| XIONG et al                     | Isolation and identification of two new compounds from the seeds of <i>Moringa oleifera</i> and their antiviral and anti-inflammatory activities                          | China                    | 2020 | Nat Prod Res                      | <i>In vitro</i>           | Vitexin                                                                                       | Influenza A (H1N1) virus                   |
| VERMA, HENDERSON and SHEN et al | Proton-Coupled Conformational Activation of SARS Coronavirus Main Proteases and Opportunity for Designing Small-Molecule Broad-Spectrum Targeted Covalent Inhibitors      | United States of America | 2020 | J Am Chem Soc.                    | <i>In silico</i>          | Galangin                                                                                      | Severe respiratory syndrome 2 (SARS-Cov-2) |
| KUMAR et al                     | In silico studies reveal antiviral effects of traditional Indian spices on COVID-19                                                                                       | India                    | 2020 | Curr Pharm Des                    | <i>In silico</i>          | Myricetin, Rutin, Luteolin, Scopolin, Apigenin, others                                        | Severe respiratory syndrome 2 (SARS-Cov-2) |
| JAIN et al                      | In silico evaluation of flavonoids as effective antiviral agents on the spike glycoprotein of SARS-CoV-2                                                                  | India                    | 2020 | Saudi J Biol Sci.                 | <i>In silico</i>          | Rutin, quercetin, naringin, morin, luteolin, hesperetin, galangin, fisetin, chrysin, apigenin | Severe respiratory syndrome 2 (SARS-Cov-2) |
| Hamza et al                     | nCOV-19 peptides mass fingerprinting identification, binding, and blocking of inhibitors flavonoids and anthraquinone of <i>Moringa oleifera</i> and hydroxychloroquine   | Pakistan                 | 2021 | J Biomol Struct Dyn.              | <i>In silico/In vitro</i> | <i>Moringa oleifera</i> flavonoid extract                                                     | Severe respiratory syndrome 2 (SARS-Cov-2) |
| Li et al                        | Inhibitory Activity of Honeysuckle Extracts against Influenza A Virus In Vitro and In Vivo                                                                                | China                    | 2021 | Virol Sin.                        | <i>In vitro/In vivo</i>   | Honeysuckle flavonoid extract                                                                 | Influenza A H1N1, H3N2 and H1N1-H275Y      |
| Dubey and Dubey                 | Molecular Docking Studies of Bioactive Nicotiflorin against 6W63 Novel Coronavirus 2019 (COVID-19)                                                                        | India                    | 2021 | Comb chem High Throughput Screen. | <i>In silico</i>          | Nicotiflorin                                                                                  | Severe respiratory syndrome 2 (SARS-Cov-2) |
| Rameshkumar et al               | Computational selection of flavonoid compounds as inhibitors against SARS-CoV-2 main protease, RNA-dependent RNA polymerase and spike proteins: A molecular docking study | Saudi Arabia             | 2021 | Saudi J Biol Sci.                 | <i>In silico</i>          | 458 flavonoid compounds                                                                       | Severe respiratory syndrome 2 (SARS-Cov-2) |
| Gogoi et al                     | Computational guided identification of a citrus flavonoid as potential inhibitor of SARS-CoV-2 main protease                                                              | India                    | 2021 | Mol Divers.                       | <i>In silico</i>          | 44 citrus flavonoids                                                                          | Severe respiratory syndrome 2 (SARS-Cov-2) |



|                   |                                                                                                                                               |        |      |                        |                  |                                                                                                                                        |                                                |
|-------------------|-----------------------------------------------------------------------------------------------------------------------------------------------|--------|------|------------------------|------------------|----------------------------------------------------------------------------------------------------------------------------------------|------------------------------------------------|
| Kumar et al       | In Silico Studies Reveal Antiviral Effects of Traditional Indian Spices on COVID-19                                                           | India  | 2021 | Curr Pharm Des.        | <i>In silico</i> | 75 compounds, among them myricetin, isovitexin, rutin, astragalin, luteolin, and apigenin                                              | Severe respiratory syndrome 2 (SARS-Cov-2)     |
| Jain et al        | In silico evaluation of flavonoids as effective antiviral agents on the spike glycoprotein of SARS-CoV-2                                      | India  | 2021 | Saudi J biol Sci.      | <i>In silico</i> | Apigenin, chrysin, fisetin, galangin, hesperetin, luteolin, morin, naringin, quercetin and rutin                                       | Severe respiratory syndrome 2 (SARS-Cov-2)     |
| Leal et al        | Amazonian <i>Siparuna</i> extracts as potential anti-influenza agents: Metabolic fingerprinting                                               | Brazil | 2021 | J Ethnopharmacol.      | <i>In vitro</i>  | Flavonoid rich fraction                                                                                                                | Influenza A (H1N1) virus                       |
| Potshangbam et al | Phenylbenzopyrone of Flavonoids as a Potential Scaffold to Prevent SARSCoV-2 Replication by Inhibiting its M PRO Main Protease                | India  | 2021 | Curr Pharm biotechnol. | <i>In silico</i> | Screening of natural compound libraries                                                                                                | Severe respiratory syndrome 2 (SARS-Cov-2)     |
| Bhowmmik et al    | In silico validation of potent phytochemical orientin as inhibitor of SARS-CoV-2 spike and host cell receptor GRP78 binding                   | India  | 2021 | Heliyon.               | <i>In silico</i> | Orientin                                                                                                                               | Severe respiratory syndrome 2 (SARS-Cov-2)     |
| D'Angeli et al    | Antimicrobial, Antioxidant, and Cytotoxic Activities of Juglans regia L. Pellicle Extract                                                     | Italy  | 2021 | Antibiotics            | <i>In silico</i> | <i>Juglans regia</i> L. Pellicle Extract                                                                                               | Herpes simplex virus 1 and 2 (HSV-1 and HSV-2) |
| Schonhofer et al  | Flavonoid-based inhibition of cyclin-dependent kinase 9 without concomitant inhibition of histone deacetylases durably reinforces HIV latency | Canada | 2021 | Biochem Pharmacol.     | <i>In vitro</i>  | chrysin, apigenin, luteolin, flavopiridol, luteolin and luteolin-7-glucoside                                                           | Human immunodeficiency virus (HIV)             |
| Swain et al       | Anti-HIV-drug and phyto-flavonoid combination against SARS-CoV-2: a molecular docking-simulation base assessment                              | India  | 2021 | J Biomol Struct Dyn.   | <i>In silico</i> | apigenin, catechin, dihydroquercetin, epigallocatechin gallate, hesperidin, LPRP-Et-97543, quercetin, quercetin-3-rhamnoside and rutin | Severe respiratory syndrome 2 (SARS-Cov-2)     |

|                     |                                                                                                                                                                            |                          |      |                          |                  |                                                                                                                                                                                                                             |                                            |
|---------------------|----------------------------------------------------------------------------------------------------------------------------------------------------------------------------|--------------------------|------|--------------------------|------------------|-----------------------------------------------------------------------------------------------------------------------------------------------------------------------------------------------------------------------------|--------------------------------------------|
| Lima et al          | Flavonoids from Pterogyne nitens as Zika virus NS2B-NS3 protease inhibitors                                                                                                | Brazil                   | 2021 | Bioorg Chem.             | <i>In silico</i> | Screening of 150 natural compounds, including quercetin, rutin and pedalitin                                                                                                                                                | Zika Virus (ZIKV)                          |
| Rakshit et al       | Flavonoids as potential therapeutics against novel coronavirus disease-2019 (nCOVID-19)                                                                                    | India                    | 2021 | J Biomol Struct Dyn.     | <i>In silico</i> | Rhoifolin, 5,7dimethoxyflavanone-40-O-b-glucopyranoside, baicalin, luteolin, kaempferol, isoquercetin, tamarixetin, 5-Hydroxy-3,4,7-trimethoxy-flavonone , euparotine, diosmetin, daidzein, nepitrin, taxifolin, hesperidin | Severe respiratory syndrome 2 (SARS-Cov-2) |
| Nair et al          | Artemisia annua L. extracts inhibit the in vitro replication of SARS-CoV-2 and two of its variants                                                                         | United States of America | 2021 | J Ethnopharmacol.        | <i>In vitro</i>  | Flavonoid-rich extract                                                                                                                                                                                                      | Severe respiratory syndrome 2 (SARS-Cov-2) |
| Kumari and Subbarao | Deep learning model for virtual screening of novel 3C-like protease enzyme inhibitors against SARS coronavirus diseases                                                    | India                    | 2021 | Comput Biol Med.         | <i>In silico</i> | 327 flavonoids                                                                                                                                                                                                              | Severe respiratory syndrome 2 (SARS-Cov-2) |
| Rahman et al        | Molecular docking analysis of rutin reveals possible inhibition of SARS-CoV-2 vital proteins                                                                               | India                    | 2021 | J tradit complement Med. | <i>In silico</i> | Rutin                                                                                                                                                                                                                       | Severe respiratory syndrome 2 (SARS-Cov-2) |
| Bodoruske et al     | Wild Sambucus nigra L. from north-east edge of the species range: A valuable germplasm with inhibitory capacity against SARS-CoV2 S-protein RBD and hACE2 binding in vitro | Latvia                   | 2021 | Ind Crops Prod           | <i>In vitro</i>  | Flavonoid-rich extract                                                                                                                                                                                                      | Severe respiratory syndrome 2 (SARS-Cov-2) |
| Zhang et al         | Flavonoid-triazolyl hybrids as potential anti-hepatitis C virus agents: Synthesis and biological evaluation                                                                | China                    | 2021 | Eur J Med Chem.          | <i>In vitro</i>  | 19 synthetic flavonoid derivatives                                                                                                                                                                                          | Hepatitis C virus (HCV)                    |

|                      |                                                                                                                                                              |                          |      |                      |                           |                                                                                                    |                                            |
|----------------------|--------------------------------------------------------------------------------------------------------------------------------------------------------------|--------------------------|------|----------------------|---------------------------|----------------------------------------------------------------------------------------------------|--------------------------------------------|
| Bhati et al          | Rational design of flavonoid based potential inhibitors targeting SARS-CoV 3CL protease for the treatment of COVID-19                                        | India                    | 2021 | J Mol. Struct.       | <i>In silico</i>          | 15 flavonoid-based compounds and quercetin                                                         | Severe respiratory syndrome 2 (SARS-Cov-2) |
| Zhan et al           | Potential antiviral activity of isorhamnetin against SARS-CoV-2 spike pseudotyped virus in vitro                                                             | China                    | 2021 | Drug Dev Res.        | <i>In vitro</i>           | Flavonoid-rich fraction, quercetin and isorhamnetin                                                | Severe respiratory syndrome 2 (SARS-Cov-2) |
| Zandi et al          | Baicalein and Baicalin Inhibit SARS-CoV-2 RNA-Dependent-RNA Polymerase                                                                                       | United States of America | 2021 | Microorganisms       | <i>In vitro</i>           | Baicalein and baicalin                                                                             | Severe respiratory syndrome 2 (SARS-Cov-2) |
| Mishra et al         | The interaction of the bioflavonoids with five SARS-CoV-2 proteins targets: An in silico study                                                               | United States of America | 2021 | Comput Biol Med.     | <i>In silico</i>          | 85 flavonoid compounds                                                                             | Severe respiratory syndrome 2 (SARS-Cov-2) |
| Su et al             | Identification of pyrogallol as a warhead in design of covalent inhibitors for the SARS-CoV-2 3CL protease                                                   | China                    | 2021 | Nat Commun.          | <i>In silico/In vitro</i> | Myricitin and derivatives                                                                          | Severe respiratory syndrome 2 (SARS-Cov-2) |
| Rudrapal et al       | In silico screening of phytopolyphenolics for the identification of bioactive compounds as novel protease inhibitors effective against SARS-CoV-2            | India                    | 2021 | J Biol Dtruct Dyn.   | <i>In silico</i>          | Taxifolin, eriodictyol, leucopelargonidin, morin and myricetin                                     | Severe respiratory syndrome 2 (SARS-Cov-2) |
| Mangiavacchi et al   | Seleno-Functionalization of Quercetin Improves the Non-Covalent Inhibition of Mpro and Its Antiviral Activity in Cells against SARS-CoV-2                    | Italy                    | 2021 | Int J Mol Sci.       | <i>In silico/In vitro</i> | Selenium and tellurium-quercetin derivatives                                                       | Severe respiratory syndrome 2 (SARS-Cov-2) |
| Jiménez-Avalos et al | Comprehensive virtual screening of 4.8 k flavonoids reveals novel insights into allosteric inhibition of SARS-CoV-2 M PRO                                    | Peru                     | 2021 | Sci Rep.             | <i>In silico</i>          | 4800 flavonoids                                                                                    | Severe respiratory syndrome 2 (SARS-Cov-2) |
| Xiong et al          | Flavonoids in Ampelopsis grossedentata as covalent inhibitors of SARS-CoV-2 3CL pro: Inhibition potentials, covalent binding sites and inhibitory mechanisms | China                    | 2021 | Int J Biol Macromol. | <i>In silico/In vitro</i> | Ampelopsis grossedentata flavonoids, including dihydromyricetin, isodihydromyricetin and myricetin | Severe respiratory syndrome 2 (SARS-Cov-2) |

|                          |                                                                                                                                                              |                          |      |                    |                           |                                                                                            |                                                            |
|--------------------------|--------------------------------------------------------------------------------------------------------------------------------------------------------------|--------------------------|------|--------------------|---------------------------|--------------------------------------------------------------------------------------------|------------------------------------------------------------|
| Kim et al                | Antiviral Activity of Chrysin against Influenza Virus Replication via Inhibition of Autophagy                                                                | China                    | 2021 | Viruses            | <i>In vitro</i>           | Chrysin                                                                                    | Influenza A (H1N1) virus                                   |
| Umar                     | Flavonoid compounds of buah merah ( Pandanus conoideus Lamk) as a potent SARS-CoV-2 main protease inhibitor: in silico approach                              | Indonesia                | 2021 | Futur J Pharm Sci. | <i>In silico</i>          | Quercetin 3'-glucoside, quercetin 3-O-glucose, and taxifolin 3-O- $\alpha$ -arabinopyranos | Severe respiratory syndrome 2 (SARS-Cov-2)                 |
| Elhusseiny et al         | Antiviral, Cytotoxic, and Antioxidant Activities of Three Edible Agaricomycetes Mushrooms: Pleurotus columbinus, Pleurotus sajor-caju, and Agaricus bisporus | Egypt                    | 2021 | J Fungi            | <i>In vitro</i>           | Flavonoid-rich extract                                                                     | Adenovirus type 7 (Ad7) and Herpes simplex virus 2 (HSV-2) |
| Rehman et al.            | Effectiveness of Natural Antioxidants against SARS-CoV-2? Insights from the In-Silico World                                                                  | Pakistan                 | 2021 | Antibiotics        | <i>In silico</i>          | Various flavonoids                                                                         | Severe respiratory syndrome 2 (SARS-Cov-2)                 |
| Lalani, Masomian and Poh | Functional Insights into Silymarin as an Antiviral Agent against Enterovirus A71 (EV-A71)                                                                    | Malasya                  | 2021 | In J Mol Sci.      | <i>In silico/In vitro</i> | Silymarin                                                                                  | Enterovirus A71                                            |
| Chiou et al              | Ugonin J Acts as a SARS-CoV-2 3C-like Protease Inhibitor and Exhibits Anti-inflammatory Properties                                                           | Taiwan                   | 2021 | Front Pharmacol.   | <i>In silico/In vitro</i> | Ugonin J                                                                                   | Severe respiratory syndrome 2 (SARS-Cov-2)                 |
| Panagiotopoulos et al    | Natural Polyphenols Inhibit the Dimerization of the SARS-CoV-2 Main Protease: The Case of Fortunellin and Its Structural Analogs                             | Greece                   | 2021 | Molecules          | <i>In vitro</i>           | Fortunellin                                                                                | Severe respiratory syndrome 2 (SARS-Cov-2)                 |
| Alomair et al            | In Silico Prediction of the Phosphorylation of NS3 as an Essential Mechanism for Dengue Virus Replication and the Antiviral Activity of Quercetin            | United States of America | 2021 | Biology            | <i>In silico</i>          | Quercetin                                                                                  | Dengue Virus (DENV)                                        |
| Long, Zhao and Wu        | Hesperetin inhibits KSHV reactivation and is reversed by HIF1 $\alpha$ overexpression                                                                        | China                    | 2021 | J Gen Virol        | <i>In vitro</i>           | Hesperetin                                                                                 | Kaposi's sarcoma-associated herpesvirus (KSHV)             |

|                      |                                                                                                                                                           |          |      |                    |                           |                                                                     |                                                |
|----------------------|-----------------------------------------------------------------------------------------------------------------------------------------------------------|----------|------|--------------------|---------------------------|---------------------------------------------------------------------|------------------------------------------------|
| Al-Karmalawy et al   | Naturally Available Flavonoid Aglycones as Potential Antiviral Drug Candidates against SARS-CoV-2                                                         | Egypt    | 2021 | Molecules          | <i>In silico/In vitro</i> | taxifolin, pectolinarigenin, tangeretin, gardenin B, and hispidulin | Severe respiratory syndrome 2 (SARS-Cov-2)     |
| Xiao et al           | Both Baicalein and Gallocatechin Gallate Effectively Inhibit SARS-CoV-2 Replication by Targeting Mpro and Sepsis in Mice                                  | China    | 2021 | Inflammation       | <i>In silico/In vitro</i> | 35 flavonoids                                                       | Severe respiratory syndrome 2 (SARS-Cov-2)     |
| Hengphasatporn et al | Alkyne-Tagged Apigenin, a Chemical Tool to Navigate Potential Targets of Flavonoid Anti-Dengue Leads                                                      | Thailand | 2021 | Molecules          | <i>In silico/In vitro</i> | Alkyne-tagged apigenin                                              | Dengue Virus 2 (DENV2)                         |
| Jantakee et al       | Anti-Herpes Simplex Virus Efficacy of Silk Cocoon, Silkworm Pupa and Non-Sericin Extracts                                                                 | Thailand | 2021 | Antibiotics        | <i>In vitro</i>           | Flavonoid-rich extract                                              | Herpes simplex virus 1 and 2 (HSV-1 and HSV-2) |
| Melk et al           | Antiviral Activity of Zinc Oxide Nanoparticles Mediated by Plumbago indica L. Extract Against Herpes Simplex Virus Type 1 (HSV-1)                         | Egypt    | 2021 | Int J Nanomedicine | <i>In vitro</i>           | Flavonoid-rich extract                                              | Herpes simplex virus 1 (HSV-1)                 |
| Attallah             | Promising Antiviral Activity of Agrimonia pilosa Phytochemicals against Severe Acute Respiratory Syndrome Coronavirus 2 Supported with In Vivo Mice Study | Egypt    | 2021 | Pharmaceuticals    | <i>In vivo</i>            | Flavonoid-rich extract                                              | Severe respiratory syndrome 2 (SARS-Cov-2)     |
